# Supplementary material for: Oxidative pentose phosphate pathway controls vascular mural cell coverage by regulating extracellular matrix composition
Source: Springer Nature journal article supplement (doi:10.1038/s42255-021-00514-4), 2022-01-27
Supplement: MOESM1 [file 42255_2021_514_MOESM1_ESM.pdf]

**Supplementary information**

---

**Oxidative pentose phosphate pathway  
controls vascular mural cell coverage by  
regulating extracellular matrix  
composition**

---

In the format provided by the  
authors and unedited

**Extended Table 1.** Table of differentially expressed genes with logarithmic fold change  $\log(\text{G6PD}^{\text{KD}}/\text{control})$  less or equal to -1 among the 3216 differentially expressed genes in HUVECs. Genes are ordered by expression.

| ENSEMBL         | SYMBOL  | GENENAME                                               | G6PD <sup>KD</sup> vs ctrl: logFC | G6PD <sup>KD</sup> vs ctrl : FDR |
|-----------------|---------|--------------------------------------------------------|-----------------------------------|----------------------------------|
| ENSG00000160211 | G6PD    | glucose-6-phosphate dehydrogenase                      | -3.085117842535                   | 0                                |
| ENSG00000049540 | ELN     | elastin                                                | -2.506967765570                   | 1.37716 e <sup>-59</sup>         |
| ENSG00000187513 | GJA4    | gap junction protein alpha 4                           | -2.017167581098                   | 0                                |
| ENSG00000140092 | FBLN5   | fibulin 5                                              | -1.358019180929                   | 1.33291 e <sup>-55</sup>         |
| ENSG00000122641 | INHBA   | inhibin subunit beta A                                 | -1.348684049315                   | 2.05706 e <sup>-50</sup>         |
| ENSG00000265107 | GJA5    | gap junction protein alpha 5                           | -1.307709107698                   | 2.70104 e <sup>-87</sup>         |
| ENSG00000136928 | GABBR2  | gamma-aminobutyric acid type B receptor subunit 2      | -1.301767478588                   | 2.82392 e <sup>-05</sup>         |
| ENSG00000069482 | GAL     | galanin and GMAP prepropeptide                         | -1.298538650590                   | 0.008167222                      |
| ENSG00000073737 | DHRS9   | dehydrogenase/reductase 9                              | -1.285747193423                   | 4.44652 e <sup>-14</sup>         |
| ENSG0000010671  | BTK     | Bruton tyrosine kinase                                 | -1.244838434208                   | 1.95983 e <sup>-08</sup>         |
| ENSG00000161638 | ITGA5   | integrin subunit alpha 5                               | -1.242524748572                   | 3.62902 e <sup>-76</sup>         |
| ENSG00000111886 | GABRR2  | gamma-aminobutyric acid type A receptor rho2 subunit   | -1.170703355055                   | 0.034432473                      |
| ENSG00000132541 | RIDA    | reactive intermediate imine deaminase A homolog        | -1.170038514697                   | 4.01384 e <sup>-10</sup>         |
| ENSG00000144674 | GOLGA4  | golgin A4                                              | -1.168280446256                   | 6.40297 e <sup>-94</sup>         |
| ENSG00000173597 | SULT1B1 | sulfotransferase family 1B member 1                    | -1.167036673751                   | 3.6327 e <sup>-109</sup>         |
| ENSG00000125148 | MT2A    | metallothionein 2A                                     | -1.106758601378                   | 8.91307 e <sup>-39</sup>         |
| ENSG00000134363 | FST     | follistatin                                            | -1.105295654442                   | 8.9845 e <sup>-30</sup>          |
| ENSG00000116183 | PAPPA2  | pappalysin 2                                           | -1.104796144010                   | 0.000287774                      |
| ENSG00000113721 | PDGFRB  | platelet derived growth factor receptor beta           | -1.100336318322                   | 0.076995282                      |
| ENSG00000187689 | AMTN    | amelotin                                               | -1.049357561835                   | 2.10888 e <sup>-08</sup>         |
| ENSG00000125740 | FOSB    | FosB proto-oncogene, AP-1 transcription factor subunit | -1.044894984992                   | 5.12874 e <sup>-15</sup>         |
| ENSG00000107165 | TYRP1   | tyrosinase related protein 1                           | -1.043852718115                   | 6.31117 e <sup>-05</sup>         |
| ENSG00000138378 | STAT4   | signal transducer and activator of transcription 4     | -1.035287352096                   | 5.35083 e <sup>-06</sup>         |
| ENSG00000241945 | PWP2    | PWP2, small subunit processome component               | -1.029257752058                   | 0.010676468                      |
| ENSG00000050767 | COL23A1 | collagen type XXIII alpha 1 chain                      | -1.020922660842                   | 0.000289029                      |
| ENSG00000197565 | COL4A6  | collagen type IV alpha 6 chain                         | -1.018591609403                   | 2.50429 e <sup>-05</sup>         |

**Extended Table 2.** Reactome pathway enrichment analyses of the 3216 Differentially Expressed Genes (DEGs) identified comparing G6PD<sup>KD</sup> vs control. Pathways with adjusted p-value lower than 0.01 have been considered as enriched. Pathways are ordered by mean Fold Change (G6PD<sup>KD</sup> / control) reported in logarithmic scale in the table. Additionally, the fold change mean of the pathway genes has been calculated considering up and down-regulated genes separately.

| ID            | Pathway                                        | DEGs in Pathway | Adjusted p-value | mean Fold Change of all genes (log) | mean Fold Change of upregulated genes (log) | mean Fold Change of downregulated genes (log) |
|---------------|------------------------------------------------|-----------------|------------------|-------------------------------------|---------------------------------------------|-----------------------------------------------|
| R-HSA-216083  | Integrin cell surface interactions             | 38              | 0.00507919       | 0.4771                              | 0.6321                                      | -0.5297                                       |
| R-HSA-202733  | Cell surface interactions at the vascular wall | 54              | 0.00507919       | 0.3488                              | 0.4647                                      | -0.3315                                       |
| R-HSA-1474244 | Extracellular matrix organization              | 125             | 4.9669E-05       | 0.3422                              | 0.4881                                      | -0.4582                                       |
| R-HSA-6785807 | Interleukin-4 and Interleukin-13 signaling     | 46              | 0.00507919       | 0.3298                              | 0.5565                                      | -0.2951                                       |
| R-HSA-1474228 | Degradation of the extracellular matrix        | 56              | 0.00507919       | 0.29822                             | 0.4316                                      | -0.3450                                       |
| R-HSA-1280215 | Cytokine Signaling in Immune system            | 279             | 1.482E-06        | 0.2544                              | 0.4976                                      | -0.2411                                       |
| R-HSA-449147  | Signaling by Interleukins                      | 185             | 0.00048029       | 0.2127                              | 0.4796                                      | -0.2347                                       |
| R-HSA-6798695 | Neutrophil degranulation                       | 190             | 0.00048029       | 0.2023                              | 0.3521                                      | -0.22293                                      |
| R-HSA-977225  | Amyloid fiber formation                        | 53              | 0.00507919       | -0.0451                             | 0.3252                                      | -0.3529                                       |
| R-HSA-69620   | Cell Cycle Checkpoints                         | 160             | 0.00507919       | -0.1975                             | 0.3004                                      | -0.2750                                       |
| R-HSA-68886   | M Phase                                        | 207             | 0.00145827       | -0.2174                             | 0.2610                                      | -0.2794                                       |

**Extended Table 3.** The table provides the nucleotide sequences for shRNA, MO, sgRNA and primers for genotyping, sequencing and qPCR used in this study.

| Oligonucleotides                                 |                                                                                     |                                                   |
|--------------------------------------------------|-------------------------------------------------------------------------------------|---------------------------------------------------|
| shRNA targeting sequence: G6PD                   | 5'-CAACAGATACAAGAACGTGAA-3'                                                         | TRCN0000025817 (McBrayer, Yarrington et al. 2012) |
| shRNA targeting sequence: PGD:                   | 5'-GTGGATGATTTTCATCGAGAAA-3'                                                        | TRCN0000028584                                    |
| Morpholino: MO-elna (Gene Tools)                 | 5'-GATCAGTGTTGCGTTGCTCCT TCT-3                                                      | (Moriyama, Ito et al. 2016)                       |
| Morpholino: MO-elnb (Gene Tools)                 | 5'-CCGGGCCATCCTGCTCTGTAATAAC-3'                                                     | (Moriyama, Ito et al. 2016)                       |
| Morpholino: MO-gata1 (Gene Tools)                | 5'-CTGCAAGTGTAGTATTGAAGATGTC-3'                                                     | ZDB-MRPHLNO-050208-10                             |
| g6pd sgRNA 1                                     | 5'-GGTCCCGAAAGGCTCCACTCGT-3'<br>5'-GAGTGGAGCCTTTTCGGGACCGA-3'                       | N/A                                               |
| g6pd sgRNA 2                                     | 5'-GGAGGATATTTTGACGATTTGT-3'<br>5'-AAATCGTCAAATATCCTCCGA-3'                         | N/A                                               |
| pgd sgRNA1                                       | 5'-GGACATGCAGCTGATCTGTGGT-3'<br>5'-CACAGATCAGCTGCATGTCCGA-3'                        | N/A                                               |
| pgd sgRNA2                                       | 5'-GGAGAAGAATCTTCTGTTTGTGT-3'<br>5'-ACAAACAGAAGATTCTTCTCCGA-3'                      | N/A                                               |
| elna sgRNA                                       | 5'-GGAAGATTCTACCCAATGGCGT-3'<br>5'-GCCATTGGGTAGAATCTTCCGA-3'                        | N/A                                               |
| pgd specific oligo <i>pgd</i> <sup>uto71</sup>   | 5'ATTTAGGTGACACTATAG <b>GGACATGCAGCT GATCTGTGG</b> TTTTAGAGCTAGAAATAGCAAG-3'        | N/A                                               |
| g6pd specific oligo <i>g6pd</i> <sup>uto70</sup> | 5'ATTTAGGTGACACTATAG <b>GGTCCCGAAAGG CTCCACTC</b> GTTTTAGAGCTAGAAATAGCAAG-3'        |                                                   |
| Constant oligo                                   | 5'AAAGCACCGACTCGGTGCCACTTTTTCAAGTTGATAACGGACTAGCCTTATTTAACTTGCTATTTCTAGCTCTAAAAC-3' | (Gagnon, Valen et al. 2014)                       |

| RT-qPCR                  | Forward primer (5'-3')      | Reverse primer (5'-3')        | References                            |
|--------------------------|-----------------------------|-------------------------------|---------------------------------------|
| Human <i>G6PD</i>        | GCAAACAGAGTGAGCCCTTC        | GAGTTGCGGGCAAAGAAGT           | (Liu, Li et al. 2015)                 |
| Human <i>PGD</i>         | CGGATCATCCTCCTGGTG          | ATGATGTCACCAGTATCCAACAA       | (Bhanot, Weisberg et al. 2017)        |
| Human <i>KLF2</i>        | GCACCGCCACTCACACCTG         | CCGCAGCCGTCCCAGTTG            | (Wang, Xiong et al. 2016)             |
| Human <i>ELASTIN</i> (1) | GGCCATTCTGGTGGAGTTC<br>C    | AACTGGCTTAAGAGGTTTGCCT<br>CCA | (Deslee, Woods et al. 2009)           |
| Human <i>ELASTIN</i> (2) | AAAGCAGCAGCAAAGTTCGG        | ACCTGGGACAACCTGGAATCC         | (Gruemmer, Klein-Hitpass et al. 2005) |
| Human <i>LAMA4</i>       | GGATGTCAGCGGAGAAATGG        | CGACAGGGTGTGAAAGAATCC         |                                       |
| Human <i>COL4A1</i>      | CCTGGTCTTGAAAGGTGATA<br>AG  | CCCGCTAT CCCTTGA TCTC         | (Wang, Xiong et al. 2016)             |
| Human <i>FN1</i>         | CCATAAAGGGCAACCAAGAG        | ACCTCGGTGTTGTAAGGTGG          | (Luco, Pan et al. 2010)               |
| Human <i>B-ACTIN</i>     | GATGGAGTTGAAGGTAGTTT<br>CGT | GCGGGAAATCGTGCGTAGCATT        |                                       |
| Mouse <i>B-actin</i>     | GTA CTCTGTTGGATCGGTGG       | AAACGCAGCTCAGTAACAGTCC        |                                       |
| Mouse <i>Pgd</i>         | CACCTGCTGCCAAAGATCAG        | TCAAACCTGGAACCTTCTGGGGA       |                                       |
| Mouse <i>Elastin</i>     | TGGTATTGGTGGCATCGG          | CCTTGGCTTTGACTCCTGTG          | (Ambalavanan, Li et al. 2007)         |
| Mouse <i>Cdh5</i>        | GACAAGGATGTGGTGCCAGT        | CTGCCATACTTGACCGTGA           |                                       |
| Mouse <i>Col4a1</i>      | CTGGCACAAAAGGGACGAG         | ACGTGGCCGAGAATTTCCACC         |                                       |
| Mouse <i>Vegfr2</i>      | TAGCTGTCGCTCTGTGGTTCT       | TGTCCCCTGCAAGTAATCTGAA        |                                       |
| Zebrafish <i>g6pd</i>    | TTTAGCTCTCAGTGCCGGAG        | CTGCCACAAAAGACGTCCAA          |                                       |
| Zebrafish <i>pgd</i>     | GAGTTCGGCTGGTCTCTGAA        | ATCTCGTGTCTGTACCCGTC          |                                       |
| Zebrafish <i>mcherry</i> | GAACGGCCACGAGTTGAGA         | CTTGGAGCCGTACATGAACTGA<br>GG  |                                       |
| Zebrafish <i>elna</i>    | AGGATATGGAGGAGCTGCTG        | AGAATCTTCCAGCACCACCA          |                                       |
| Zebrafish <i>elnb</i>    | GGAAGGTACCTCTGCTCTTG        | TCCTGTTCCAACCTCCTCCAG         |                                       |
| Zebrafish <i>B-actin</i> | GTATCCACGAGACCACCTTC<br>A   | GAGGAGGGCAAAGTGGTAAAC         | (Mugoni, Postel et al. 2013)          |
| Zebrafish <i>pdgfrb</i>  | CGTTCCCAGGAGCCTTTTCT        | TTGGGATCAGGGATGGGGAT          | (Ando, Wang et al. 2019)              |
| Zebrafish <i>acta2</i>   | AACACCCCCTCTGTTGACA         | GCATAGAGAGACAGCACTGC          |                                       |
| Zebrafish <i>tie1</i>    | CCTGTAGAACATTGGCAGCC        | AATGTTTGGTCCGAACTGCC          |                                       |
| Zebrafish <i>cdh5</i>    | GGACACTGGACAGAGAGCAA        | ACACGTAGCTCCATTGGTT           |                                       |

| Genotyping Oligonucleotides | Forward Primer (5'-3')        | Reverse Primer (5'-3')       |
|-----------------------------|-------------------------------|------------------------------|
| <i>Mouse Pgd-F1-F2</i>      | GGGACACGACAGTAAGTGTT          | CAAGAGAGACAGGGGCTGAG         |
| <i>Mouse Pgd-F3-F4</i>      | TGTTCCCTCAGGCCAACTCT          | GTTCCCACTTTTGCAGCGAT         |
| <i>Mouse Tie2:Cre</i>       | CGCATAACCAGTGAAACAGCATT<br>GC | CCCTGTGCTCAGACAGAAATGA<br>GA |
| <i>Mouse Cdh5:CreERT2</i>   | ACACCTGCTACCATATCA<br>TCCTAC  | CATCGACCGGTAATGCAG           |

|                                                                              |                       |                         |
|------------------------------------------------------------------------------|-----------------------|-------------------------|
| <i>Zebrafish</i><br><i>G6pd</i> <sup>sa24272</sup>                           | TGTTTGC GCAGAGGCTGGAA | GAGAGGAGAGAAACCATGGGAT  |
| <i>Zebrafish</i><br><i>pgd</i> <sup>sa24360</sup>                            | CAGAGCATTGCTGCCAAAGT  | CGGCACATTAGAAAGCAAAGAG  |
| <i>Zebrafish pgd</i> <sup>uto71</sup><br><i>HMA</i>                          | TGCGACTGGGTTGGAGATG   | ACAAAGCACGTCCTTCATCAG   |
| <i>Zebrafish pgd</i> <sup>uto71</sup><br><i>sequencing</i>                   | TGTTTCTTCAGGCCACACTT  | GAGCAGAGATAGCCGTCCAT    |
| <i>Zebrafis</i><br><i>g6pd</i> <sup>uto72</sup> <i>sequencin</i><br><i>g</i> | CCGGTCACTCTCTCAGATGT  | CCCAGCGTTCGTTCTTTACATAA |
| <i>Zebrafis g6pd</i> <sup>uto70</sup><br><i>HMA</i>                          | GAGAAGGGGAGGCCAAACTG  | CCCAGCGTTCGTTCTTTACATAA |
| <i>Zebrafis g6pd</i> <sup>uto72</sup><br><i>T7E1</i>                         | TTTGCTCTTTGGCCGAAGTG  | GCGTTTCACATTCTGACTCCA   |
| <i>Zebrafis pgd</i> <sup>uto73</sup><br><i>T7E1</i>                          | TGTTTCTTCAGGCCACACTT  | GAGCAGAGATAGCCGTCCAT    |
| <i>Zebrafish elna</i>                                                        | CGAGGGCGGAGGTAGATTTT  | ACTTTGCTGACTGTTTCATGGA  |

## References

- Ambalavanan, N., P. Li, A. Bulger, J. Murphy-Ullrich, S. Oparil and Y. F. Chen (2007). "Endothelin-1 mediates hypoxia-induced increases in vascular collagen in the newborn mouse lung." *Pediatr Res* **61**(5 Pt 1): 559-564.
- Ando, K., W. Wang, D. Peng, A. Chiba, A. K. Lagendijk, L. Barske, J. G. Crump, D. Y. R. Stainier, U. Lendahl, K. Koltowska, B. M. Hogan, S. Fukuhara, N. Mochizuki and C. Betsholtz (2019). "Periarterial specification of vascular mural cells from naive mesenchyme requires Notch signaling." *Development* **146**(2).
- Bhanot, H., E. L. Weisberg, M. M. Reddy, A. Nonami, D. Neuberg, R. M. Stone, K. Podar, R. Salgia, J. D. Griffin and M. Sattler (2017). "Acute myeloid leukemia cells require 6-phosphogluconate dehydrogenase for cell growth and NADPH-dependent metabolic reprogramming." *Oncotarget* **8**(40): 67639-67650.
- Deslee, G., J. C. Woods, C. M. Moore, L. Liu, S. H. Conradi, M. Milne, D. S. Gierada, J. Pierce, A. Patterson, R. A. Lewit, J. T. Battaile, M. J. Holtzman, J. C. Hogg and R. A. Pierce (2009). "Elastin expression in very severe human COPD." *Eur Respir J* **34**(2): 324-331.
- Gagnon, J. A., E. Valen, S. B. Thyme, P. Huang, L. Akhmetova, A. Pauli, T. G. Montague, S. Zimmerman, C. Richter and A. F. Schier (2014). "Efficient mutagenesis by Cas9 protein-mediated oligonucleotide insertion and large-scale assessment of single-guide RNAs." *PLoS One* **9**(5): e98186.
- Gruemmer, R., L. Klein-Hitpass and J. Neulen (2005). "Regulation of gene expression in endothelial cells: the role of human follicular fluid." *J Mol Endocrinol* **34**(1): 37-46.
- Liu, Y., Y. Li, M. E. March, K. Nguyen, K. Xu, F. Wang, Y. Guo, B. Keating, J. Glessner, J. Li, T. J. Ganley, J. Zhang, M. A. Deardorff, X. Xu and H. Hakonarson (2015). "Copy number variation in CEP57L1 predisposes to congenital absence of bilateral ACL and PCL ligaments." *Hum Genomics* **9**: 31.
- Luco, R. F., Q. Pan, K. Tominaga, B. J. Blencowe, O. M. Pereira-Smith and T. Misteli (2010). "Regulation of alternative splicing by histone modifications." *Science* **327**(5968): 996-1000.
- McBrayer, S. K., M. Yarrington, J. Qian, G. Feng, M. Shanmugam, V. Gandhi, N. L. Krett and S. T. Rosen (2012). "Integrative gene expression profiling reveals G6PD-mediated resistance to RNA-directed nucleoside analogues in B-cell neoplasms." *PLoS One* **7**(7): e41455.
- Moriyama, Y., F. Ito, H. Takeda, T. Yano, M. Okabe, S. Kuraku, F. W. Keeley and K. Koshiba-Takeuchi (2016). "Evolution of the fish heart by sub/neofunctionalization of an elastin gene." *Nat Commun* **7**: 10397.
- Mugoni, V., R. Postel, V. Catanzaro, E. De Luca, E. Turco, G. Digilio, L. Silengo, M. P. Murphy, C. Medana, D. Y. Stainier, J. Bakkers and M. M. Santoro (2013). "Ubiad1 is an antioxidant enzyme that regulates eNOS activity by CoQ10 synthesis." *Cell* **152**(3): 504-518.

Wang, J. K., G. M. Xiong, B. Luo, C. C. Choo, S. Yuan, N. S. Tan and C. Choong (2016). "Surface modification of PVDF using non-mammalian sources of collagen for enhancement of endothelial cell functionality." J Mater Sci Mater Med **27**(3): 45.
